# Supplementary material for: Co-variance nexus between ultraviolet index and tropospheric ozone during COVID-19 lockdown over megacities of India
Source: Research Square preprint supplement (doi:10.21203/rs.3.rs-297076/v1), 2021-03-13
Supplement: Supplementary file 1 [file 45637769bcfc126d099dd700.docx]

**Table S8** Cluster membership of selective megacities based on tropospheric O3 and UV index during 2019-2020

| Year | Name of the megacities | Cluster | Distance |
| --- | --- | --- | --- |
| 2019 | New Delhi | 1 | 5.829 |
| 2020 | 2 | 5.485 |
| 2019 | Mumbai | 1 | 4.258 |
| 2020 | 2 | 5.107 |
| 2019 | Kolkata | 1 | 1.025 |
| 2020 | 2 | 5.485 |
| 2019 | Chennai | 1 | 4.704 |
| 2020 | 2 | 5.983 |
