# Supplementary material for: Co-variance nexus between ultraviolet index and tropospheric ozone during COVID-19 lockdown over megacities of India
Source: Research Square preprint supplement (doi:10.21203/rs.3.rs-297076/v1), 2021-03-13
Supplement: Supplementary file 2 [file 61b2e675c227e29d13f2121e.docx]

**Table S5 Climatic data over Kolkata during pre-lockdown (2019) and lockdown (2020) period**
