# Supplementary material for: Co-variance nexus between ultraviolet index and tropospheric ozone during COVID-19 lockdown over megacities of India
Source: Research Square preprint supplement (doi:10.21203/rs.3.rs-297076/v1), 2021-03-13
Supplement: Supplementary file 3 [file de4d634fc4728325c84ca03f.docx]

**Table S7** Paired sample test for tropospheric O3 and UVI during the sampling period of 2019-2020

| **Sampling period** | **Selective variables** | **Paired differences** | | | | | **t** | **df** | **Sig. (2-tailed)** |
| --- | --- | --- | --- | --- | --- | --- | --- | --- | --- |
|  |  | **Mean** | **Standard deviation** | **Standard error mean** | **95% Confidence interval of the difference** | |  |  |  |
| **Lower** | **Upper** |
| 2019-2020 | O3 | -10.060 | 13.905 | 0.843 | -11.720 | -8.400 | -11.932 | 271 | 0.000 |
| UVI | 0.58757 | 0.83103 | 0.05039 | 0.48837 | 0.68677 | 11.661 | 271 | 0.000 |
