# Supplementary material for: Co-variance nexus between ultraviolet index and tropospheric ozone during COVID-19 lockdown over megacities of India
Source: Research Square preprint supplement (doi:10.21203/rs.3.rs-297076/v1), 2021-03-13
Supplement: Supplementary file 4 [file e764d6465b33a31f4afa5eb1.docx]

**Table S2**

Daily average range of ultraviolet index (UVI) during the sampling period of 2019 – 2020 (25th March – 31st May)
